# Supplementary material
Source: Springer Nature journal article supplement (https://www.springermedizin.de/resource/supplementary/12885_2008_1105_MOESM5_ESM.pdf/9471128)

**(A) Ferroportin-1**

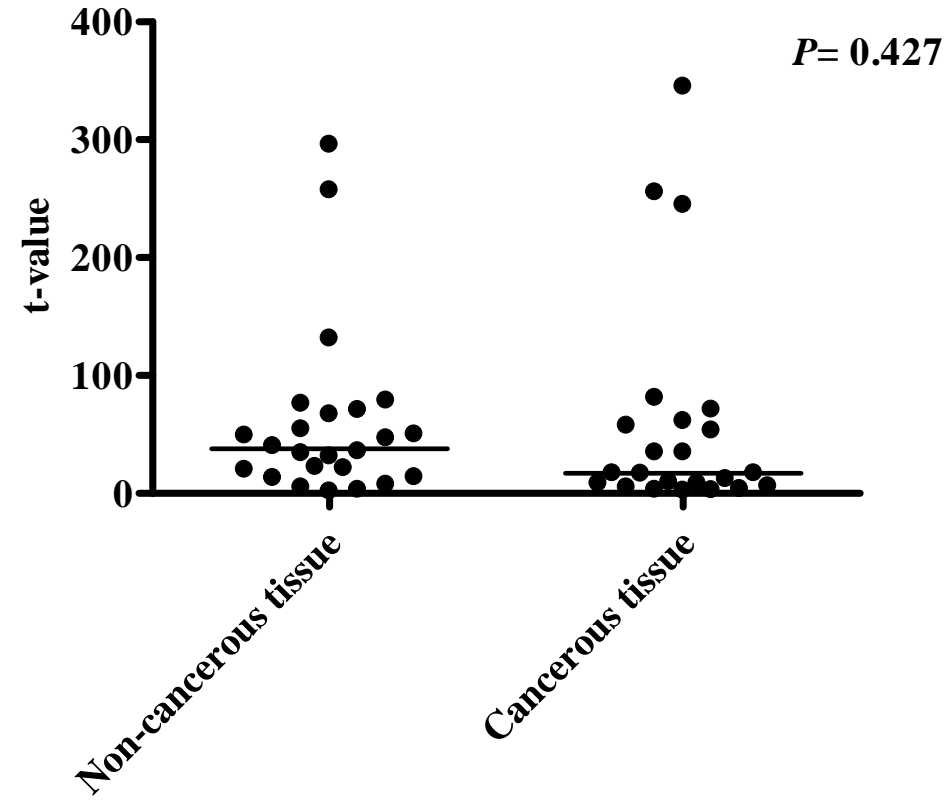

**(B) TfR2**

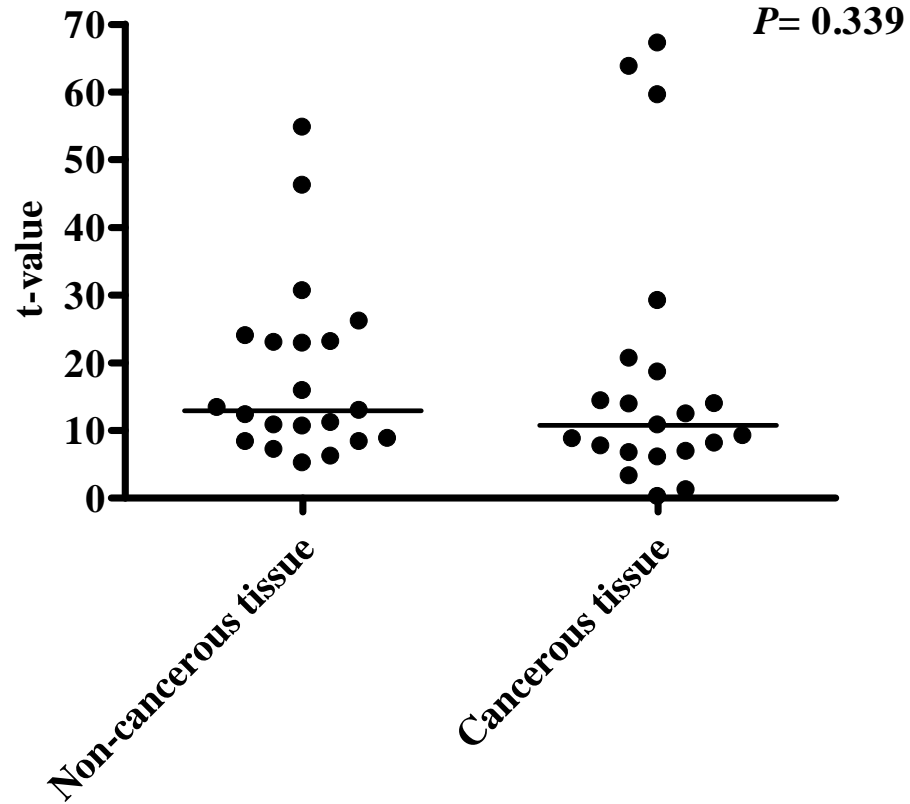

Supplement: MOESM5 [file 9471128]
